# Supplementary material for: NICU Admissions for Meconium Aspiration Syndrome before and after a National Resuscitation Program Suctioning Guideline Change
Source: MDPI journal article supplement (doi:10.3390/children6050068), 2019-05-07
Supplement: s1 [file s1]

**Table S1. Participating Centers**

|                                                                   |             |
|-------------------------------------------------------------------|-------------|
| Huntsville Hospital                                               | Alabama     |
| Baptist Medical Center East                                       | Alabama     |
| St. Vincent Birmingham                                            | Alabama     |
| The Children's Hospital at Providence, Alaska                     | Alaska      |
| St. Joseph's Hospital and Medical Center                          | Arizona     |
| Cardon Children's Medical Center                                  | Arizona     |
| Banner Thunderbird Medical Center                                 | Arizona     |
| Banner Estrella Medical Center                                    | Arizona     |
| Abrazo Arrowhead Campus                                           | Arizona     |
| Arizona Children's Center Maricopa Integrated Health              | Arizona     |
| Flagstaff Medical Center                                          | Arizona     |
| Willow Creek Women's Hospital                                     | Arkansas    |
| University of Arkansas for Medical Sciences                       | Arkansas    |
| Mercy Hospital Fort Smith                                         | Arkansas    |
| Providence Tarzana Medical Center                                 | California  |
| Providence Little Company of Mary Medical Center                  | California  |
| Rocky Mountain Hospital for Children at Presbyterian/Saint Luke's | Colorado    |
| St. Mary's Hospital and Medical Center                            | Colorado    |
| Swedish Medical Center                                            | Colorado    |
| Poudre Valley Hospital                                            | Colorado    |
| Good Samaritan Medical Center                                     | Colorado    |
| Denver Health Medical Center                                      | Colorado    |
| Stamford Hospital                                                 | Connecticut |
| Danbury Hospital                                                  | Connecticut |
| Yale-New Haven Children's Hospital                                | Connecticut |
| Connecticut Children's NICU at UCONN Health Center                | Connecticut |
| Norwalk Hospital                                                  | Connecticut |
| The Hospital of Central Connecticut                               | Connecticut |
| Greenwich Hospital                                                | Connecticut |

|                                                                   |                      |
|-------------------------------------------------------------------|----------------------|
| Washington Hospital Center                                        | District of Columbia |
| Joe DiMaggio Children's Hospital                                  | Florida              |
| Florida Hospital for Children                                     | Florida              |
| Sacred Heart Health System                                        | Florida              |
| Baptist Children's Hospital                                       | Florida              |
| St. Joseph's Children's Hospital                                  | Florida              |
| Women's Center at Florida Hospital - Tampa                        | Florida              |
| UF Shands Hospital Gainesville                                    | Florida              |
| UF Health Jacksonville                                            | Florida              |
| North Florida Regional Medical Center, Inc.                       | Florida              |
| Gwinnett Hospital System                                          | Georgia              |
| The Medical Center at Columbus Regional                           | Georgia              |
| Piedmont Rockdale Hospital                                        | Georgia              |
| Hamilton Medical Center                                           | Georgia              |
| Floyd Medical Center                                              | Georgia              |
| Kapiolani Medical Center for Women & Children                     | Hawaii               |
| St. Luke's Regional Medical Center                                | Idaho                |
| St. Luke's Magic Valley                                           | Idaho                |
| Eastern Idaho Regional Medical Center                             | Idaho                |
| Advocate Children's Hospital - Park Ridge                         | Illinois             |
| Children's Hospital of Illinois at OSF St. Francis Medical Center | Illinois             |
| St. John's Hospital                                               | Illinois             |
| Carle Foundation Hospital                                         | Illinois             |
| Rockford Memorial Hospital                                        | Illinois             |
| University of Illinois at Chicago                                 | Illinois             |
| Advocate Children's Hospital - Oak Lawn                           | Illinois             |
| Advocate Illinois Masonic Medical Center                          | Illinois             |
| Edward Hospital and Health Services                               | Illinois             |
| Rush Copley Medical Center                                        | Illinois             |
| Advocate Good Samaritan Hospital                                  | Illinois             |

|                                         |          |
|-----------------------------------------|----------|
| Adventist Hinsdale Hospital             | Illinois |
| St. Alexius Medical Center              | Illinois |
| Provena Saint Joseph Medical Center     | Illinois |
| St. Joseph Hospital Chicago             | Illinois |
| Memorial Hospital of Carbondale         | Illinois |
| St. Vincent Women's Hospital            | Indiana  |
| Dupont Hospital                         | Indiana  |
| Franciscan Health Lafayette             | Indiana  |
| St. Vincent Evansville                  | Indiana  |
| Lutheran Hospital of Indiana            | Indiana  |
| Women's Hospital                        | Indiana  |
| St. Joseph Hospital                     | Indiana  |
| St. Vincent Carmel Hospital             | Indiana  |
| Franciscan St. Francis Health           | Indiana  |
| Blank Children's Hospital               | Iowa     |
| Genesis Medical Center                  | Iowa     |
| St. Luke's Hospital                     | Iowa     |
| St. Luke's Regional Medical Center      | Iowa     |
| Covenant Medical Center                 | Iowa     |
| Wesley Medical Center                   | Kansas   |
| Via Christi Hospitals Wichita           | Kansas   |
| University of Kansas Hospital Authority | Kansas   |
| Overland Park Regional Medical Center   | Kansas   |
| Shawnee Mission Medical Center          | Kansas   |
| Kentucky Children's Hospital            | Kentucky |
| Norton Children's Hospital              | Kentucky |
| University of Louisville Hospital       | Kentucky |
| Norton Women's and Children's Hospital  | Kentucky |
| The Medical Center NICU Bowling Green   | Kentucky |
| King's Daughters Medical Center         | Kentucky |

|                                         |               |
|-----------------------------------------|---------------|
| Methodist Hospital                      | Kentucky      |
| Jennie Stuart Medical Center            | Kentucky      |
| Baptist Health Madisonville             | Kentucky      |
| Frankfort Regional Medical Center       | Kentucky      |
| Baptist Health Lexington                | Kentucky      |
| Owensboro Health Regional Hospital      | Kentucky      |
| Baptist Health Paducah                  | Kentucky      |
| The Women's Hospital at St. Joseph East | Kentucky      |
| St. Elizabeth Healthcare                | Kentucky      |
| Woman's Hospital                        | Louisiana     |
| Willis Knighton South                   | Louisiana     |
| Christus Lake Area Hospital             | Louisiana     |
| Christus St. Frances Cabrini Hospital   | Louisiana     |
| West Jefferson Medical Center           | Louisiana     |
| Ochsner Medical Center WestBank         | Louisiana     |
| Lake Charles Memorial Hosp for Women    | Louisiana     |
| Touro Infirmary                         | Louisiana     |
| CHRISTUS Highland                       | Louisiana     |
| Ochsner Medical Center Baton Rouge      | Louisiana     |
| Terrebonne General Medical Center       | Louisiana     |
| Eastern Maine Medical Center            | Maine         |
| Frederick Memorial Hospital             | Maryland      |
| Johns Hopkins Hospital                  | Maryland      |
| Prince George's Hospital Center         | Maryland      |
| UMass Memorial Healthcare               | Massachusetts |
| Steward St. Elizabeth's Medical Center  | Massachusetts |
| Baystate Medical Center                 | Massachusetts |
| Tufts Medical Center                    | Massachusetts |
| Beth Israel Deaconess Medical Center    | Massachusetts |
| Brigham and Women's Hospital            | Massachusetts |

|                                                      |               |
|------------------------------------------------------|---------------|
| Massachusetts General Hospital for Children          | Massachusetts |
| South Shore Hospital                                 | Massachusetts |
| Boston Medical Center                                | Massachusetts |
| DeVos Children's, Spectrum Health                    | Michigan      |
| Sparrow Hospital                                     | Michigan      |
| U. of MI, CS Mott Children's, Brandon NICU           | Michigan      |
| Children's Hospital at Bronson                       | Michigan      |
| Munson Medical Center                                | Michigan      |
| UPHS - Marquette                                     | Michigan      |
| Children's Hospitals and Clinics - Minneapolis       | Minnesota     |
| University of MN Masonic Children's Hospital         | Minnesota     |
| Children's Hospitals and Clinics - St Paul           | Minnesota     |
| Hennepin County Medical Center                       | Minnesota     |
| Merit Health River Oaks                              | Mississippi   |
| North Mississippi Medical Center                     | Mississippi   |
| Forrest General Hospital                             | Mississippi   |
| Mississippi Baptist Health Systems                   | Mississippi   |
| Merit Health Wesley                                  | Mississippi   |
| St. Dominic, Jackson Memorial Hospital               | Mississippi   |
| Merit Health Woman's Hospital                        | Mississippi   |
| Children's Hospital at U. of Mississippi Health Care | Mississippi   |
| SSM Health Cardinal Glennon Children's Hospital      | Missouri      |
| St. Luke's Hospital                                  | Missouri      |
| Women's & Children's Hosp, U. of MO                  | Missouri      |
| St. Louis Children's Hospital                        | Missouri      |
| Centerpoint Medical Center                           | Missouri      |
| Research Medical Center                              | Missouri      |
| Cox Health Neonatology                               | Missouri      |
| Mercy Kids Springfield                               | Missouri      |
| St. Vincent Hospital & Health Center                 | Montana       |

|                                                |               |
|------------------------------------------------|---------------|
| Benefis Healthcare                             | Montana       |
| Billings Clinic                                | Montana       |
| CHI Health Bergan Mercy Medical Center         | Nebraska      |
| Nebraska Medical Center                        | Nebraska      |
| Bryan Medical Center                           | Nebraska      |
| Good Samaritan Hospital Kearney                | Nebraska      |
| Methodist Women's Hospital                     | Nebraska      |
| Children's Hospital of Nevada at UMC           | Nevada        |
| St. Rose Dominican Hospital Siena Campus       | Nevada        |
| Elliot Hospital                                | New Hampshire |
| Monmouth Medical Center                        | New Jersey    |
| Hackensack University Medical Center           | New Jersey    |
| Robert Wood Johnson University Hospital        | New Jersey    |
| Community Medical Center Toms River            | New Jersey    |
| Mountainside Hospital                          | New Jersey    |
| Atlanticare Regional Medical Center            | New Jersey    |
| Shore Medical Center                           | New Jersey    |
| Inspira Health Network                         | New Jersey    |
| UNM School of Medicine Dept. of Pediatrics     | New Mexico    |
| Lovelace Women's Hospital                      | New Mexico    |
| St. Joseph's Health Center                     | New York      |
| Lenox Hill Hospital                            | New York      |
| Richmond University Medical Center             | New York      |
| Weiler Hospital Montefiore                     | New York      |
| Columbia University Medical Center             | New York      |
| Maimonides Medical Center                      | New York      |
| North Shore University Hospital                | New York      |
| Cohen Children's Medical Center of New York    | New York      |
| Mt. Sinai Kravis Children's Hospital, The      | New York      |
| Montefiore Medical Center - Wakefield Division | New York      |

|                                                   |                |
|---------------------------------------------------|----------------|
| Vidant Medical Center                             | North Carolina |
| Cone Health Women's Hospital                      | North Carolina |
| NHRMC Betty H.Cameron Women & Children's Hospital | North Carolina |
| Forsyth Memorial Hospital                         | North Carolina |
| Cape Fear Valley Medical Center                   | North Carolina |
| WakeMedical Center                                | North Carolina |
| Mission Children's Hospital                       | North Carolina |
| FirstHealth Moore Regional Hospital               | North Carolina |
| Catawba Valley Medical Center                     | North Carolina |
| Onslow Memorial Hospital                          | North Carolina |
| Rex Hospital                                      | North Carolina |
| Jeff Gordon Children's Hospital at CMC            | North Carolina |
| Sanford Medical Center Fargo                      | North Dakota   |
| Sanford Bismarck Medical Center                   | North Dakota   |
| Essentia Health                                   | North Dakota   |
| Trinity Hospital                                  | North Dakota   |
| Miami Valley Hospital                             | Ohio           |
| Aultman Hospital                                  | Ohio           |
| NCH at Riverside Methodist Hospital               | Ohio           |
| NCH at Grant Medical Center                       | Ohio           |
| Akron Children's NICU at St. Elizabeth - Boardman | Ohio           |
| NCH at Doctor's Hospital West                     | Ohio           |
| Cleveland Clinic Foundation, The                  | Ohio           |
| University Hospital, Cincinnati                   | Ohio           |
| NCH NICU at Ohio State Medical Center             | Ohio           |
| NCH at Dublin Methodist Hospital                  | Ohio           |
| Kettering Medical Center                          | Ohio           |
| NCH NICU at Mount Carmel St. Ann's Hospital       | Ohio           |
| Henry Zarrow Neonatal Intensive Care Unit         | Oklahoma       |
| O.U. Health Sciences Center                       | Oklahoma       |

|                                                     |                |
|-----------------------------------------------------|----------------|
| St. John Medical Center                             | Oklahoma       |
| Randall Children's Hospital at Legacy Emanuel       | Oregon         |
| Providence St. Vincent Medical Center               | Oregon         |
| Rogue Regional Medical Center                       | Oregon         |
| Sacred Heart Medical Center                         | Oregon         |
| St. Charles Health Care                             | Oregon         |
| Oregon Health and Science University                | Oregon         |
| Salem Hospital                                      | Oregon         |
| St. Luke's University Hospital                      | Pennsylvania   |
| Thomas Jefferson University Hospital                | Pennsylvania   |
| Hahnemann University Hospital                       | Pennsylvania   |
| St. Luke's Allentown Campus                         | Pennsylvania   |
| St. Vincent Health Center                           | Pennsylvania   |
| Penn Highlands DuBois                               | Pennsylvania   |
| Hamot Medical Center                                | Pennsylvania   |
| Moses Taylor Hospital                               | Pennsylvania   |
| Ephrata Community Hospital                          | Pennsylvania   |
| Riddle Hospital                                     | Pennsylvania   |
| St. Mary Medical Center                             | Pennsylvania   |
| Einstein Medical Center Montgomery                  | Pennsylvania   |
| Children's Hospital of Greenville                   | South Carolina |
| Medical University of South Carolina                | South Carolina |
| McLeod Regional Medical Center                      | South Carolina |
| Palmetto Health Richland                            | South Carolina |
| Palmetto Health Baptist Women's & Neonatal Services | South Carolina |
| Summerville Medical Center                          | South Carolina |
| Trident Medical Center                              | South Carolina |
| Avera McKennan                                      | South Dakota   |
| Boekelheide NICU at Sanford Health                  | South Dakota   |
| Rapid City Regional Hospital                        | South Dakota   |



|                                                       |           |
|-------------------------------------------------------|-----------|
| University of Tennessee Medical Center                | Tennessee |
| Baptist Memorial Hospital for Women                   | Tennessee |
| Niswonger Children's Hospital                         | Tennessee |
| Monroe Carell Jr. Children's Hospital Vanderbilt      | Tennessee |
| Maury Regional Medical Center                         | Tennessee |
| Harris Methodist Fort Worth Hospital                  | Texas     |
| Texas Tech University Health Science Center           | Texas     |
| McLane Children's Hospital                            | Texas     |
| John Peter Smith Hospital                             | Texas     |
| Memorial Hermann Southwest                            | Texas     |
| Medical City Plano                                    | Texas     |
| Corpus Christi Medical Center                         | Texas     |
| Christus Good Shepherd Medical Center                 | Texas     |
| Children's Memorial Hermann Hospital                  | Texas     |
| Texas Health Presbyterian Hospital Plano              | Texas     |
| Texas Children's Hospital, Baylor College of Medicine | Texas     |
| Texas Health Arlington Memorial Hospital              | Texas     |
| Memorial Hermann Memorial City Medical Center         | Texas     |
| Baylor All Saints Medical Center                      | Texas     |
| Woman's Hospital of Texas, The                        | Texas     |
| Memorial Hermann The Woodlands                        | Texas     |
| Valley Regional Medical Center Texas                  | Texas     |
| Medical City Lewisville                               | Texas     |
| Memorial Hermann Southeast                            | Texas     |
| Christus Trinity Mother Frances Health System         | Texas     |
| Covenant Women and Children's Hospital                | Texas     |
| St. Luke's The Woodlands Hospital                     | Texas     |
| Methodist Willowbrook Hospital                        | Texas     |
| Lyndon B. Johnson General Hospital                    | Texas     |
| Ben Taub General Hospital                             | Texas     |

|                                                              |               |
|--------------------------------------------------------------|---------------|
| Clear Lake Regional Medical Center                           | Texas         |
| University of Texas Southwestern Med. Ctr. Dallas            | Texas         |
| Kingwood Medical Center                                      | Texas         |
| Lake Pointe Medical Center                                   | Texas         |
| Cypress Fairbanks Medical Center Hospital                    | Texas         |
| CHRISTUS Southeast Texas Hospital                            | Texas         |
| Timpanogos Regional Hospital                                 | Utah          |
| Children's Hospital of the King's Daughters                  | Virginia      |
| Inova Fair Oaks Hospital                                     | Virginia      |
| Centra Health, Virginia Baptist Hospital                     | Virginia      |
| University of Virginia                                       | Virginia      |
| Children's Hosp of Richmond at VCU                           | Virginia      |
| Johnston-Willis Hospital                                     | Virginia      |
| CJW Medical Center, Chippenham Campus                        | Virginia      |
| Spotsylvania Regional Medical Center                         | Virginia      |
| Mary Washington Hospital                                     | Virginia      |
| Virginia Hospital Center                                     | Virginia      |
| Inova Loudoun Hospital                                       | Virginia      |
| Deaconess Hospital                                           | Washington    |
| Providence Sacred Heart Medical Center & Children's Hospital | Washington    |
| Kadlec Regional Medical Center                               | Washington    |
| UW Medicine - Valley Medical Center                          | Washington    |
| Legacy Salmon Creek Hospital                                 | Washington    |
| PeaceHealth Southwest Medical Center                         | Washington    |
| Evergreen Health                                             | Washington    |
| Overlake Hospital Medical Center                             | Washington    |
| Providence Regional Medical Center Everett                   | Washington    |
| MultiCare Health System - Tacoma General Hospital            | Washington    |
| West Virginia University School of Medicine                  | West Virginia |
| St. Joseph Hospital-Marshfield Clinic                        | Wisconsin     |

|                                              |           |
|----------------------------------------------|-----------|
| SSM Health St. Mary's Hospital Madison       | Wisconsin |
| Ascension - St. Joseph's Hospital            | Wisconsin |
| Aurora Sinai Medical Center                  | Wisconsin |
| Columbia St. Mary's Hospital                 | Wisconsin |
| Ascension All Saints Hospital                | Wisconsin |
| Gundersen Lutheran Medical Center            | Wisconsin |
| St. Vincent Hospital                         | Wisconsin |
| Children's Hospital of Wisconsin, Fox Valley | Wisconsin |
| Affinity NICU at St. Elizabeth Hospital      | Wisconsin |
| Meriter Hospital                             | Wisconsin |
| Aurora Baycare Medical Center                | Wisconsin |
| Aspirus Wausau Hospital                      | Wisconsin |
| Aurora Women's Pavilion                      | Wisconsin |
